# Supplementary material for: Comparison Effects of two Muscle Relaxant Strategies on Postoperative Pulmonary Complications in Transapical Transcatheter Aortic Valve Implantation: A Propensity Score-Matched Analysis
Source: Research Square preprint supplement (doi:10.21203/rs.3.rs-1006569/v1), 2021-10-28
Supplement: Supplementary file 1 [file bdbc15a2d77d8c9a01543672.docx]

**Supplemental Table S1. The criteria for postoperative pulmonary complications**

| Complication | Definition |
| --- | --- |
| Respiratory infection | Patient has received antibiotics for a suspected respiratory infection and met one or more of the following criteria: new or changed sputum, new or changed lung opacities, fever, white blood cell count > 12 × 109 L-1 |
| Pleural effusion | Chest radiograph demonstrating blunting of the costophrenic angle, loss of sharp silhouette of the ipsilateral hemidiaphragm in upright position, evidence of displacement of adjacent anatomical structures or (in supine position) a hazy opacity in one hemithorax with preserved vascular shadows |
| Atelectasis | Lung opacification with a shift of the mediastinum, hilum or hemidiaphragm toward the affected area, and compensatory over-inflation in the adjacent non-atelectatic lung |
| Pneumothorax | Air in the pleural space with no vascular bed surrounding the visceral pleura |
| Respiratory failure | Postoperative initiation of either noninvasive or invasive mechanical ventilation for oxygen therapy |
| Bronchospasm | Newly detected expiratory wheezing treated with bronchodilators |
| Aspiration pneumonitis | Acute lung injury after the inhalation of regurgitated gastric contents |
